# Supplementary material
Source: Research Square preprint supplement (doi:10.21203/rs.3.rs-8934873/v1)
Supplement: Supplementary file 1 [file 8ad2d35d58eb37792d797e44.docx]

| **Section and Topic** | **Item #** | **Checklist item** | **Location where item is reported** |
| --- | --- | --- | --- |
| **TITLE** | | |  |
| Title | 1 | Identify the report as a systematic review. | **Title – Page 1.** Specifically identifies the study as a "Systematic Review and Pooled Cohort Analysis" to comply with PRISMA 2020 identification standards. |
| **ABSTRACT** | | |  |
| Abstract | 2 | See the PRISMA 2020 for Abstracts checklist. | **Abstract – Page 2.** Follows the structured PRISMA 2020 for Abstracts checklist, including Background, Methods, Results, and Conclusion. |
| **INTRODUCTION** | | |  |
| Rationale | 3 | Describe the rationale for the review in the context of existing knowledge. | **Introduction (Page 2-3).** Discusses the "diagnostic trap" of cortical erosion and the lack of standardized surgical protocols in current literature. |
| Objectives | 4 | Provide an explicit statement of the objective(s) or question(s) the review addresses. | **Introduction (End of section) – Page 3.** States the objective to provide Level II evidence for cortical erosion prevalence and surgical efficacy in a 323-case cohort. |
| **METHODS** | | |  |
| Eligibility criteria | 5 | Specify the inclusion and exclusion criteria for the review and how studies were grouped for the syntheses. | **Methods (Study Selection and Eligibility Criteria) – Page 14.** Defines inclusion/exclusion criteria, including "blue bone" verification and surgical follow-up requirements. |
| Information sources | 6 | Specify all databases, registers, websites, organisations, reference lists and other sources searched or consulted to identify studies. Specify the date when each source was last searched or consulted. | **Methods (Systematic Search Strategy) – Page 14.** Specifies PubMed/MEDLINE and Google Scholar; search date range January 1983 to February 2026 |
| Search strategy | 7 | Present the full search strategies for all databases, registers and websites, including any filters and limits used. | **Methods (Systematic Search Strategy) – Page 14.** Provides the full search string including terms for "Bizarre Parosteal," "Nora's Lesion," and "Cortical Erosion." |
| Selection process | 8 | Specify the methods used to decide whether a study met the inclusion criteria of the review, including how many reviewers screened each record and each report retrieved, whether they worked independently, and if applicable, details of automation tools used in the process. | **Methods (Study Selection and Eligibility Criteria) – Page 14.** Describes independent screening and title/abstract review by two authors |
| Data collection process | 9 | Specify the methods used to collect data from reports, including how many reviewers collected data from each report, whether they worked independently, any processes for obtaining or confirming data from study investigators, and if applicable, details of automation tools used in the process. | **Methods (Data Extraction and Quality Assessment) – Page 15.** Mentions independent review and the use of a standardized data extraction form. |
| Data items | 10a | List and define all outcomes for which data were sought. Specify whether all results that were compatible with each outcome domain in each study were sought (e.g. for all measures, time points, analyses), and if not, the methods used to decide which results to collect. | **Methods (Data Extraction and Quality Assessment) – Page 15.** Lists all variables: age, gender, site, cortical status, surgical technique, and recurrence. |
| 10b | List and define all other variables for which data were sought (e.g. participant and intervention characteristics, funding sources). Describe any assumptions made about any missing or unclear information. | **Methods (Outcome Measures) – Page 15.** Explicitly defines primary (recurrence rate) and secondary (prevalence of cortical erosion) outcomes |
| Study risk of bias assessment | 11 | Specify the methods used to assess risk of bias in the included studies, including details of the tool(s) used, how many reviewers assessed each study and whether they worked independently, and if applicable, details of automation tools used in the process. | **Methods (Data Extraction and Quality Assessment) – Page 15.** Explains that formal risk of bias (e.g., ROBINS-I) tools were not applicable given the pooled cohort of retrospective case series/reports nature of the literature and rare-tumors case reports; internal consistency was verified by two independent reviewers. |
| Effect measures | 12 | Specify for each outcome the effect measure(s) (e.g. risk ratio, mean difference) used in the synthesis or presentation of results. | **Methods (Statistical Analysis) –** **Page 16.** Odds Ratio (OR) and 95% Confidence Intervals (CI) used for surgical efficacy comparison. |
| Synthesis methods | 13a | Describe the processes used to decide which studies were eligible for each synthesis (e.g. tabulating the study intervention characteristics and comparing against the planned groups for each synthesis (item #5)). | **Methods (Statistical Analysis) –** **Page 16.** Describes the stratification of cases into two primary treatment cohorts: Group A (Simple Excision) and Group B (En-bloc + High-Speed Burr). |
| 13b | Describe any methods required to prepare the data for presentation or synthesis, such as handling of missing summary statistics, or data conversions. | **Methods (Study Selection and Eligibility Criteria) – Page 14.** Describes pooling N = 323 cases and checking for diagnostic consistency. |
| 13c | Describe any methods used to tabulate or visually display results of individual studies and syntheses. | **Methods (Study Selection and Eligibility Criteria) – Page 14.** Details exclusion of cases with insufficient radiographic or surgical data. |
| 13d | Describe any methods used to synthesize results and provide a rationale for the choice(s). If meta-analysis was performed, describe the model(s), method(s) to identify the presence and extent of statistical heterogeneity, and software package(s) used. | **Methods (Statistical Analysis) –** **Page 16.** Explicitly mentions the use of the Mantel-Haenszel fixed-effect model to establish Level II evidence for surgical outcomes. |
| 13e | Describe any methods used to explore possible causes of heterogeneity among study results (e.g. subgroup analysis, meta-regression). | **Methods (Statistical Analysis) –** **Page 16.** Addresses the use of the Z-statistic to assess effect stability in rare data. |
| 13f | Describe any sensitivity analyses conducted to assess robustness of the synthesized results. | **Methods (Statistical Analysis) –** **Page 16.** States that pooled data were cross-referenced with established high-volume case series to ensure stability |
| Reporting bias assessment | 14 | Describe any methods used to assess risk of bias due to missing results in a synthesis (arising from reporting biases). | **N/A –** Formal assessment of publication bias (e.g., funnel plots) was not performed due to the rarity of BPOP and the aggregate nature of the case-level data |
| Certainty assessment | 15 | Describe any methods used to assess certainty (or confidence) in the body of evidence for an outcome. | **Methods (Statistical Analysis) – Page 16.** The study provides **Level II evidence** as per the Oxford Centre for Evidence-Based Medicine (OCEBM) criteria for pooled cohort analyses of clinical outcomes. The study provides Level II evidence based on the Mantel-Haenszel fixed-effect model for pooled cohort analysis. |
| **RESULTS** | | |  |
| Study selection | 16a | Describe the results of the search and selection process, from the number of records identified in the search to the number of studies included in the review, ideally using a flow diagram. | **Results (Study Selection and Characteristics) – Page** 4**.** Out of 1,047 records, 74 studies (323 cases) were included. |
| 16b | Cite studies that might appear to meet the inclusion criteria, but which were excluded, and explain why they were excluded. | **Results (Study Selection and Characteristics) – Page 4.** 973 were excluded during title/abstract screening. Reasons for exclusion during full-text review included: lack of surgical follow-up, duplicate case reporting, or diagnosis other than BPOP are detailed in text and Figure 1. |
| Study characteristics | 17 | Cite each included study and present its characteristics. | **Results (Pooled Cohort Demographics) – Page 5.** Summarized in **Table 1**, detailing anatomical sites and age distribution. |
| Risk of bias in studies | 18 | Present assessments of risk of bias for each included study. | **Methods (Data Extraction and Quality Assessment)**  **– Page 15.** formal risk of bias was limited by the retrospective case-series nature of the pooled data; verified by independent review. |
| Results of individual studies | 19 | For all outcomes, present, for each study: (a) summary statistics for each group (where appropriate) and (b) an effect estimate and its precision (e.g. confidence/credible interval), ideally using structured tables or plots. | **Results (Surgical Outcomes) – Page 5.** Individual outcomes are synthesized and presented as aggregate data in **Table 3 (**Shows the 60.5% vs 15.4% recurrence rate) |
| Results of syntheses | 20a | For each synthesis, briefly summarise the characteristics and risk of bias among contributing studies. | **Result (Pooled Cohort Demographics and Distribution) – Page 5.** Characteristics of the pooled cohort are summarized in **Table 1.** |
| 20b | Present results of all statistical syntheses conducted. If meta-analysis was done, present for each the summary estimate and its precision (e.g. confidence/credible interval) and measures of statistical heterogeneity. If comparing groups, describe the direction of the effect. | **Results (Surgical Outcomes) – Page 5.**  – Detailed in Table 3 and Forest plot of surgical recurrence risk is provided in Figure 4. |
| 20c | Present results of all investigations of possible causes of heterogeneity among study results. | **Results (Surgical Outcomes) – Page** **5**. Reports the pooled Odds Ratio (8.38), 95% CI: 4.76–14.75, and Z-statistic (P < 0.001). |
| 20d | Present results of all sensitivity analyses conducted to assess the robustness of the synthesized results. | **Results (Surgical Outcomes) – Page 5.** Mentions the high Z-score as an indicator of robust overall effect size. |
| Reporting biases | 21 | Present assessments of risk of bias due to missing results (arising from reporting biases) for each synthesis assessed. | **Discussion (Strengths and Limitations) – Page 13.** The reliance on published radiological descriptions for identifying cortical erosion may be subject to inter-observer variability. |
| Certainty of evidence | 22 | Present assessments of certainty (or confidence) in the body of evidence for each outcome assessed. | **Discussion (Strengths and Limitations) – Page 12-13.** Confirms that the results constitute **Level II evidence**, providing a robust statistical mandate for the proposed three-step surgical protocol. Explicitly assesses the certainty of evidence for surgical outcomes and anatomical findings in the context of retrospective data. |
| **DISCUSSION** | | |  |
| Discussion | 23a | Provide a general interpretation of the results in the context of other evidence. | **Discussion (Addressing the Diagnostic Dilemma) –** **Page 8**.– Interprets findings in the context of the WHO 2020 classification. |
| 23b | Discuss any limitations of the evidence included in the review. | **Discussion (Strengths and Limitations) – Page 12.** The certainty of the evidence is limited by the retrospective nature of the original case reports |
| 23c | Discuss any limitations of the review processes used. | **Discussion (Strengths and Limitations) – Page 13.** Addresses variability in surgical reporting and follow-up |
| 23d | Discuss implications of the results for practice, policy, and future research. | **Conclusion – Page 13.** Recommends standardized follow-up and molecular correlation |
| **OTHER INFORMATION** | | |  |
| Registration and protocol | 24a | Provide registration information for the review, including register name and registration number, or state that the review was not registered. | A protocol for this review was not registered in PROSPERO, as it utilizes aggregate data from previously published case-level series. Registration is recommended but not always mandatory for pooled analyses of rare tumors. |
| 24b | Indicate where the review protocol can be accessed, or state that a protocol was not prepared. | **N/A** No protocol was prepared/registered for this study |
| 24c | Describe and explain any amendments to information provided at registration or in the protocol. | **N/A** No registration protocol was established |
| Support | 25 | Describe sources of financial or non-financial support for the review, and the role of the funders or sponsors in the review. | This study received no external funding. |
| Competing interests | 26 | Declare any competing interests of review authors. | The authors declare no competing interests. |
| Availability of data, code and other materials | 27 | Report which of the following are publicly available and where they can be found: template data collection forms; data extracted from included studies; data used for all analyses; analytic code; any other materials used in the review. | Declarations - States that data is available from the corresponding author. |

*From:*  Page MJ, McKenzie JE, Bossuyt PM, Boutron I, Hoffmann TC, Mulrow CD, et al. The PRISMA 2020 statement: an updated guideline for reporting systematic reviews. BMJ 2021;372:n71. doi: 10.1136/bmj.n71. This work is licensed under CC BY 4.0. To view a copy of this license, visit <https://creativecommons.org/licenses/by/4.0/>
